# Supplementary material
Source: Elsevier journal article supplement (https://www.sciencedirect.com/science/article/pii/S1413867020300799)
Supplement: mmc1 [file S1413867020300799:mmc1.doc]

**Supplementary tables:**

**S 1. HLA-A* alleles frequencies in Barão and Ipiranga communities.**

| **Barão**  **Community (N=150)** | | | **Ipiranga**  **Community (N=134)** | | |
| --- | --- | --- | --- | --- | --- |
| **HLA-A*** | **n** | **%** | **HLA-A*** | **n** | **%** |
| A*01:01 | 13 | 4.33 | A*01:01 | 16 | 5.97 |
| **A*02:01** | **89** | **29.67** | **A*02:01** | **79** | **29.48** |
| **-** | - | - | A*02:02 | 1 | 0.37 |
| A*02:05 | 2 | 0.67 | A*02:05 | 1 | 0.37 |
| A*02:11 | 1 | 0.33 | A*02:11 | 6 | 2.24 |
| A*03:01 | 16 | 5.33 | A*03:01 | 11 | 4.10 |
| A*11:01 | 16 | 5.33 | A*11:01 | 15 | 5.60 |
| A*23:01 | 3 | 1.00 | A*23:01 | 2 | 0.75 |
| A*24:02 | 23 | 7.67 | A*24:02 | 25 | 9.33 |
| A*24:03 | 1 | 0.33 | A*24:03 | 1 | 0.37 |
| A*26:01 | 1 | 0.33 | A*26:01 | 1 | 0.37 |
| A*29:01 | 10 | 3.33 | A*29:01 | 3 | 1.12 |
| A*30:01 | 8 | 2.67 | A*30:01 | 2 | 0.75 |
| A*30:02 | 3 | 1.00 | A*30:02 | 4 | 1.49 |
| A*31:01 | 74 | 24.67 | A*31:01 | 63 | 23.51 |
| **-** | - | - | A*33:01 | 2 | 0.75 |
| A*34:02 | 1 | 0.33 | - | - | - |
| **-** | - | - | A*66:01 | 3 | 1.12 |
| A*68:01 | 36 | 12.00 | A*68:01 | 32 | 11.94 |
| - | - | - | A*68:02 | 1 | 0.37 |
| A*74:01 | 3 | 1.00 | - | - | - |

N: number of individuals, n: number of alleles (2n), %: allele frequency, Boldface: most frequent allele.

**S 2.** HLA-B* alleles frequencies in Barão and Ipiranga communities.

| **Barão**  **Community (N=150)** | | | **Ipiranga**  **Community (N=134)** | | |
| --- | --- | --- | --- | --- | --- |
| **HLA-B*** | **n** | **%** | **HLA-B*** | **n** | **%** |
| B*07:02 | 18 | 6.00 | B*07:02 | 21 | 7.84 |
| B*08:01 | 2 | 0.67 | B*08:01 | 9 | 3.36 |
| B*13:01 | 3 | 1.00 | **-** | - | - |
| B*13:02 | 6 | 2.00 | **-** | - | - |
| **-** | - | - | B*14:01 | 3 | 1.12 |
| B*14:02 | 3 | 1.00 | B*14:02 | 3 | 1.12 |
| B*15:01 | 5 | 1.67 | B*15:01 | 3 | 1.12 |
| B*15:03 | 11 | 3.67 | B*15:03 | 10 | 3.73 |
| B*15:04 | 8 | 2.67 | B*15:04 | 1 | 0.37 |
| **-** | - | - | B*15:05 | 2 | 0.75 |
| **-** | - | - | B*15:08 | 3 | 1.12 |
| B*15:10 | 3 | 1.00 | **-** | - | - |
| B*15:17 | 2 | 0.67 | B*15:17 | 3 | 1.12 |
| B*15:20 | 1 | 0.33 | **-** | - | - |
| B*15:47 | 2 | 0.67 | B*15:47 | 2 | 0.75 |
| B*18:01 | 12 | 4.00 | B*18:01 | 4 | 1.49 |
| B*27:03 | 7 | 2.33 | B*27:03 | 3 | 1.12 |
| B*35:01 | 37 | 12.33 | B*35:01 | 13 | 4.85 |
| **-** | - | - | B*35:02 | 4 | 1.49 |
| B*35:03 | 2 | 0.67 | B*35:03 | 1 | 0.37 |
| **-** | - | - | B*35:04 | 4 | 1.49 |
| **-** | - | - | B*35:05 | 2 | 0.75 |
| B*35:06 | 1 | 0.33 | **-** | - | - |
| B*35:07 | 1 | 0.33 | **-** | - | - |
| **-** | - | - | B*35:10 | 1 | 0.37 |
| B*35:20 | 1 | 0.33 | B*35:20 | 1 | 0.37 |
| **-** | - | - | B*35:22 | 3 | 1.12 |
| B*38:01 | 11 | 3.67 | B*38:01 | 3 | 1.12 |
| B*39:01 | 33 | 11.00 | B*39:01 | 35 | 13.06 |
| B*39:04 | 2 | 0.67 | **-** | - | - |
| B*39:05 | 15 | 5.00 | B*39:05 | 21 | 7.84 |
| B*39:06 | 6 | 2.00 | **-** | - | - |
| **-** | - | - | B*39:09 | 4 | 1.49 |
| **-** | - | - | B*39:24 | 1 | 0.37 |
| B*40:01 | 1 | 0.33 | **-** | - | - |
| **B*40:02** | **42** | **14.00** | **B*40:02** | **48** | **17.91** |
| B*40:04 | 1 | 0.33 | B*40:04 | 12 | 4.48 |
| **-** | - | - | B*41:01 | 3 | 1.12 |
| B*41:02 | 1 | 0.33 | **-** | - | - |
| **-** | - | - | B*42:01 | 1 | 0.37 |
| B*42:02 | 1 | 0.33 | **-** | - | - |
| **-** | - | - | B*44:02 | 4 | 1.49 |
| B*45:01 | 2 | 0.67 | B*45:01 | 2 | 0.75 |
| B*48:01 | 4 | 1.33 | B*48:01 | 1 | 0.37 |
| B*48:02 | 1 | 0.33 | B*48:02 | 1 | 0.37 |
| B*49:01 | 1 | 0.33 | B*49:01 | 4 | 1.49 |
| **-** | - | - | B*50:01 | 7 | 2.61 |
| B*51:01 | 15 | 5.00 | B*51:01 | 10 | 3.73 |
| **-** | - | - | B*51:13 | 1 | 0.37 |
| B*52:01 | 11 | 3.67 | B*52:01 | 4 | 1.49 |
| B*53:01 | 10 | 3.33 | B*53:01 | 2 | 0.75 |
| B*53:05 | 1 | 0.33 | B*53:05 | 2 | 0.75 |
| **-** | - | - | B*55:01 | 1 | 0.37 |
| **-** | - | - | B*56:01 | 3 | 1.12 |
| B*57:01 | 10 | 3.33 | B*57:01 | 1 | 0.37 |
| B*57:03 | 4 | 1.33 | B*57:03 | 1 | 0.37 |
| B*58:02 | 1 | 0.33 | **-** | - | - |
| B*81:01 | 2 | 0.67 | - | - | - |

N: number of individuals, n: number of alleles (2n), %: allele frequency, Boldface: most frequent allele.

**S 3. HLA-C* alleles frequencies in the Barão and Ipiranga communities.**

| **Barão**  **Community (N=150)** | | | **Ipiranga**  **Community (N=134)** | | |
| --- | --- | --- | --- | --- | --- |
| **HLA-C*** | **n** | **%** | **HLA-C*** | **n** | **%** |
| C*01:02 | 5 | 1.67 | C*01:02 | 10 | 3.73 |
| C*02:02 | 26 | 8.67 | C*02:02 | 17 | 6.34 |
| C*03:02 | 11 | 3.67 | C*03:02 | 21 | 7.84 |
| C*03:03 | 21 | 7.00 | C*03:03 | 10 | 3.73 |
| C*03:04 | 24 | 8.00 | C*03:04 | 34 | 12.69 |
| **C*04:01** | **47** | **15.67** | C*04:01 | 30 | 11.19 |
| **-** | - | - | C*04:04 | 1 | 0.37 |
| C*05:01 | 10 | 3.33 | C*05:01 | 7 | 2.61 |
| C*06:02 | 22 | 7.33 | C*06:02 | 8 | 2.99 |
| C*07:01 | 17 | 5.67 | **C*07:01** | **38** | **14.18** |
| C*07:02 | 25 | 8.33 | C*07:02 | 20 | 7.46 |
| **-** | - | - | C*07:04 | 1 | 0.37 |
| C*08:01 | 14 | 4.67 | C*08:01 | 6 | 2.24 |
| C*08:02 | 3 | 1.00 | C*08:02 | 6 | 2.24 |
| C*08:03 | 30 | 10.00 | C*08:03 | 36 | 13.43 |
| C*12:02 | 1 | 0.33 | C*12:02 | 2 | 0.75 |
| C*12:03 | 12 | 4.00 | C*12:03 | 2 | 0.75 |
| C*14:02 | 5 | 1.67 | C*14:02 | 2 | 0.75 |
| C*15:02 | 15 | 5.00 | C*15:02 | 10 | 3.73 |
| C*16:01 | 4 | 1.33 | C*16:01 | 2 | 0.75 |
| C*17:01 | 2 | 0.67 | C*17:01 | 4 | 1.49 |
| C*18:01 | 6 | 2.00 | C*18:01 | 1 | 0.37 |

N: number of individuals, n: number of alleles (2n), %: allele frequency, Boldface: most frequent allele.

**S 4.** HLA-DRB1* alleles frequencies in Barão and Ipiranga communities.

| **Barão**  **Community (N=150)** | | | **Ipiranga**  **Community (N=134)** | | |
| --- | --- | --- | --- | --- | --- |
| **HLA-DRB1*** | **n** | **%** | **HLA-DRB1*** | **n** | **%** |
| DRB1*01:01 | 3 | 1.00 | DRB1*01:01 | 4 | 1.49 |
| DRB1*01:02 | 5 | 1.67 | DRB1*01:02 | 3 | 1.12 |
| DRB1*01:03 | 2 | 0.67 | - | - | - |
| DRB1*03:01 | 20 | 6.67 | DRB1*03:01 | 12 | 4.48 |
| - | - | - | DRB1*03:02 | 1 | 0.37 |
| - | - | - | DRB1*03:05 | 1 | 0.37 |
| DRB1*04:01 | 3 | 1.00 | DRB1*04:01 | 5 | 1.87 |
| DRB1*04:02 | 2 | 0.67 | - | - | - |
| DRB1*04:03 | 6 | 2.00 | DRB1*04:03 | 2 | 0.75 |
| DRB1*04:04 | 18 | 6.00 | DRB1*04:04 | 10 | 3.73 |
| DRB1*04:05 | 1 | 0.33 | - | - | - |
| - | - | - | DRB1*04:07 | 5 | 1.87 |
| DRB1*04:10 | 1 | 0.33 | DRB1*04:10 | 1 | 0.37 |
| DRB1*04:11 | 18 | 6.00 | DRB1*04:11 | 24 | 8.96 |
| - | - | - | DRB1*04:17 | 1 | 0.37 |
| DRB1*07:01 | 30 | 10.00 | DRB1*07:01 | 18 | 6.72 |
| DRB1*08:01 | 4 | 1.33 | DRB1*08:01 | 6 | 2.24 |
| DRB1*08:02 | 3 | 1.00 | DRB1*08:02 | 14 | 5.22 |
| DRB1*08:04 | 3 | 1.00 | DRB1*08:04 | 8 | 2.99 |
| **-** | - | - | DRB1*08:07 | 9 | 3.36 |
| DRB1*09:01 | 5 | 1.67 | DRB1*09:01 | 6 | 2.24 |
| DRB1*10:01 | 2 | 0.67 | - | - | - |
| DRB1*11:01 | 11 | 3.67 | DRB1*11:01 | 7 | 2.61 |
| DRB1*11:02 | 4 | 1.33 | - | - | - |
| - | - | - | DRB1*11:03 | 1 | 0.37 |
| DRB1*11:04 | 1 | 0.33 | DRB1*11:04 | 1 | 0.37 |
| DRB1*12:01 | 2 | 0.67 | - | - | - |
| DRB1*12:02 | 7 | 2.33 | DRB1*12:02 | 2 | 0.75 |
| DRB1*13:01 | 18 | 6.00 | DRB1*13:01 | 5 | 1.87 |
| DRB1*13:02 | 19 | 6.33 | DRB1*13:02 | 9 | 3.36 |
| - | - | - | DRB1*13:03 | 3 | 1.12 |
| - | - | - | DRB1*13:04 | 1 | 0.37 |
| DRB1*14:01 | 10 | 3.33 | DRB1*14:01 | 5 | 1.87 |
| DRB1*14:02 | 13 | 4.33 | DRB1*14:02 | 19 | 7.09 |
| DRB1*14:06 | 5 | 1.67 | DRB1*14:06 | 3 | 1.12 |
| DRB1*15:01 | 10 | 3.33 | DRB1*15:01 | 19 | 7.09 |
| - | - | - | DRB1*15:03 | 4 | 1.49 |
| DRB1*16:01 | 1 | 0.33 | DRB1*16:01 | 1 | 0.37 |
| **DRB1*16:02** | **73** | **24.33** | **DRB1*16:02** | **58** | **21.64** |

N: number of individuals, n: number of alleles (2n), %: allele frequency, Boldface: most frequent allele.

**S 5. HLA-DQA1* alleles frequencies in the Barão and Ipiranga communities.**

| **Barão**  **Community (N=150)** | | | **Ipiranga**  **Community (N=134)** | | |  |
| --- | --- | --- | --- | --- | --- | --- |
| **HLA-DQA1*** | **n** | **%** | **HLA-DQA1*** | **n** | **%** | |
| DQA1*01:01 | 23 | 7.67 | DQA1*01:01 | 10 | 3.73 | |
| DQA1*01:02 | 41 | 13.67 | DQA1*01:02 | 32 | 11.94 | |
| DQA1*01:03 | 17 | 5.67 | DQA1*01:03 | 10 | 3.73 | |
| DQA1*01:07 | 2 | 0.67 | **-** | - | - | |
| DQA1*02:01 | 29 | 9.67 | DQA1*02:01 | 19 | 7.09 | |
| DQA1*03:01 | 48 | 16.00 | DQA1*03:01 | 45 | 16.79 | |
| DQA1*03:02 | 7 | 2.33 | DQA1*03:02 | 12 | 4.48 | |
| DQA1*04:01 | 10 | 3.33 | DQA1*04:01 | 37 | 13.81 | |
| DQA1*05:01 | 21 | 7.00 | DQA1*05:01 | 14 | 5.22 | |
| DQA1*05:03 | 17 | 5.67 | DQA1*05:03 | 22 | 8.21 | |
| **DQA1*05:05** | **80** | **26.67** | **DQA1*05:05** | **60** | **22.39** | |
| DQA1*05:10 | 5 | 1.67 | DQA1*05:10 | 6 | 2.24 | |
| **-** | - | - | DQA1*06:01 | 1 | 0.37 | |

N: number of individuals, n: number of alleles (2n), %: allele frequency, Boldface: most frequent allele.

**S 6. HLA-DQB1* alleles frequencies in the Barão and Ipiranga communities.**

| **Barão**  **Community (N=150)** | | | **Ipiranga**  **Community (N=134)** | | |
| --- | --- | --- | --- | --- | --- |
| **HLA-DQB1*** | **n** | **%** | **HLA-DQB1*** | **n** | **%** |
| DQB1*02:01 | 23 | 7.67 | DQB1*02:01 | 17 | 6.34 |
| DQB1*02:02 | 19 | 6.33 | DQB1*02:02 | 21 | 7.84 |
| **DQB1*03:01** | **105** | **35.00** | **DQB1*03:01** | **92** | **34.33** |
| DQB1*03:02 | 45 | 15.00 | DQB1*03:02 | 38 | 14.18 |
| DQB1*03:03 | 15 | 5.00 | DQB1*03:03 | 6 | 2.24 |
| DQB1*03:19 | 2 | 0.67 | DQB1*03:19 | 2 | 0.75 |
| DQB1*04:02 | 8 | 2.67 | DQB1*04:02 | 40 | 14.93 |
| DQB1*05:01 | 14 | 4.67 | DQB1*05:01 | 8 | 2.99 |
| DQB1*05:02 | 7 | 2.33 | DQB1*05:02 | 3 | 1.12 |
| DQB1*05:03 | 11 | 3.67 | DQB1*05:03 | 3 | 1.12 |
| DQB1*06:01 | 3 | 1.00 | **-** | - | - |
| DQB1*06:02 | 12 | 4.00 | DQB1*06:02 | 24 | 8.96 |
| DQB1*06:03 | 15 | 5.00 | DQB1*06:03 | 10 | 3.73 |
| DQB1*06:04 | 20 | 6.67 | DQB1*06:04 | 4 | 1.49 |
| DQB1*06:19 | 1 | 0.33 | **-** | - | - |

N: number of individuals, n: number of alleles (2n), %: allele frequency, Boldface: most frequent allele.
